# Supplementary material for: Neural crest stem cell multipotency requires Foxd3 to maintain neural potential and repress mesenchymal fates
Source: Oxford University Press journal article supplement (doi:10.1242/dev.054718), 2011-01-13
Supplement: dev054718figs6.pdf [file dev054718figs6.pdf]

# Supplemental Figure 6

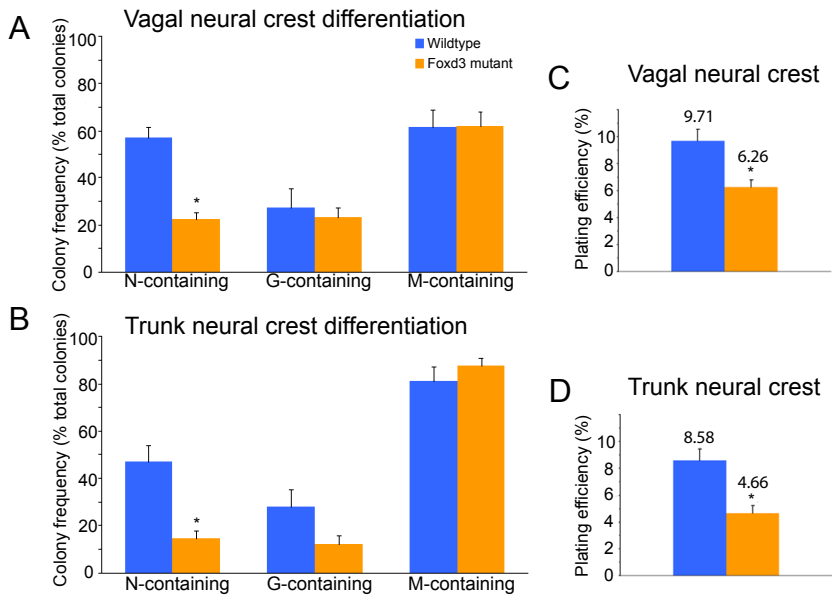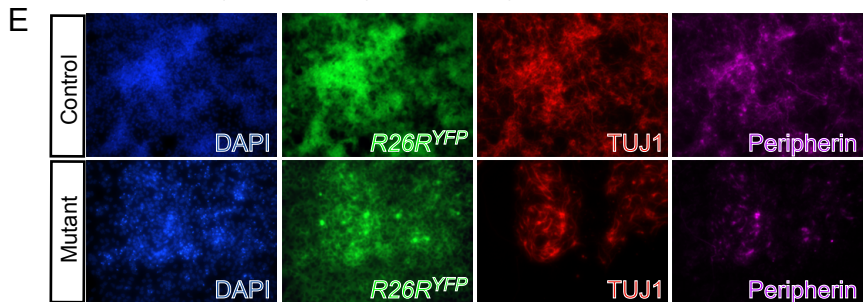

**F**

| Genotype           |     | Colonies analyzed                                                      | N+M+G | N+G      | N+M      | G+M       | N-only  | G-only    | M-only  | Other     |          |
|--------------------|-----|------------------------------------------------------------------------|-------|----------|----------|-----------|---------|-----------|---------|-----------|----------|
| Vagal Neural Crest | +/+ | <i>Foxd3<sup>lox/+</sup></i> (Wildtype)                                | 553   | 8% (46)  | 8% (46)  | 23% (127) | 2% (12) | 22% (120) | 3% (16) | 24% (131) | 10% (55) |
|                    | +/- | <i>Foxd3<sup>lox/+</sup></i> or <i>Foxd3<sup>lox/+</sup>; Wnt1-Cre</i> | 641   | 9% (57)  | 8% (50)  | 28% (180) | 3% (17) | 15% (96)  | 3% (18) | 25% (160) | 10% (63) |
|                    | -/- | <i>Foxd3<sup>lox/-</sup>; Wnt1-Cre</i> (Mutant)                        | 509   | 1% (5)   | 4% (20)  | 6% (33)   | 6% (31) | 11% (54)  | 9% (45) | 49% (248) | 14% (73) |
| Trunk Neural Crest | +/+ | <i>Foxd3<sup>lox/+</sup></i> (Wildtype)                                | 346   | 13% (45) | 10% (34) | 15% (51)  | 3% (9)  | 9% (30)   | 0% (0)  | 46% (160) | 5% (17)  |
|                    | +/- | <i>Foxd3<sup>lox/+</sup></i> or <i>Foxd3<sup>lox/+</sup>; Wnt1-Cre</i> | 452   | 10% (43) | 4% (18)  | 19% (85)  | 4% (17) | 9% (41)   | 0% (0)  | 48% (217) | 7% (31)  |
|                    | -/- | <i>Foxd3<sup>lox/-</sup>; Wnt1-Cre</i> (Mutant)                        | 370   | 2% (7)   | 2% (9)   | 5% (18)   | 3% (12) | 4% (13)   | 2% (6)  | 78% (290) | 4% (15)  |
