# Supplementary figures and images for: Neural crest stem cell multipotency requires Foxd3 to maintain neural potential and repress mesenchymal fates
Source: Oxford University Press journal article supplement (doi:10.1242/dev.054718), 2011-01-13

Supplemental Figure 1

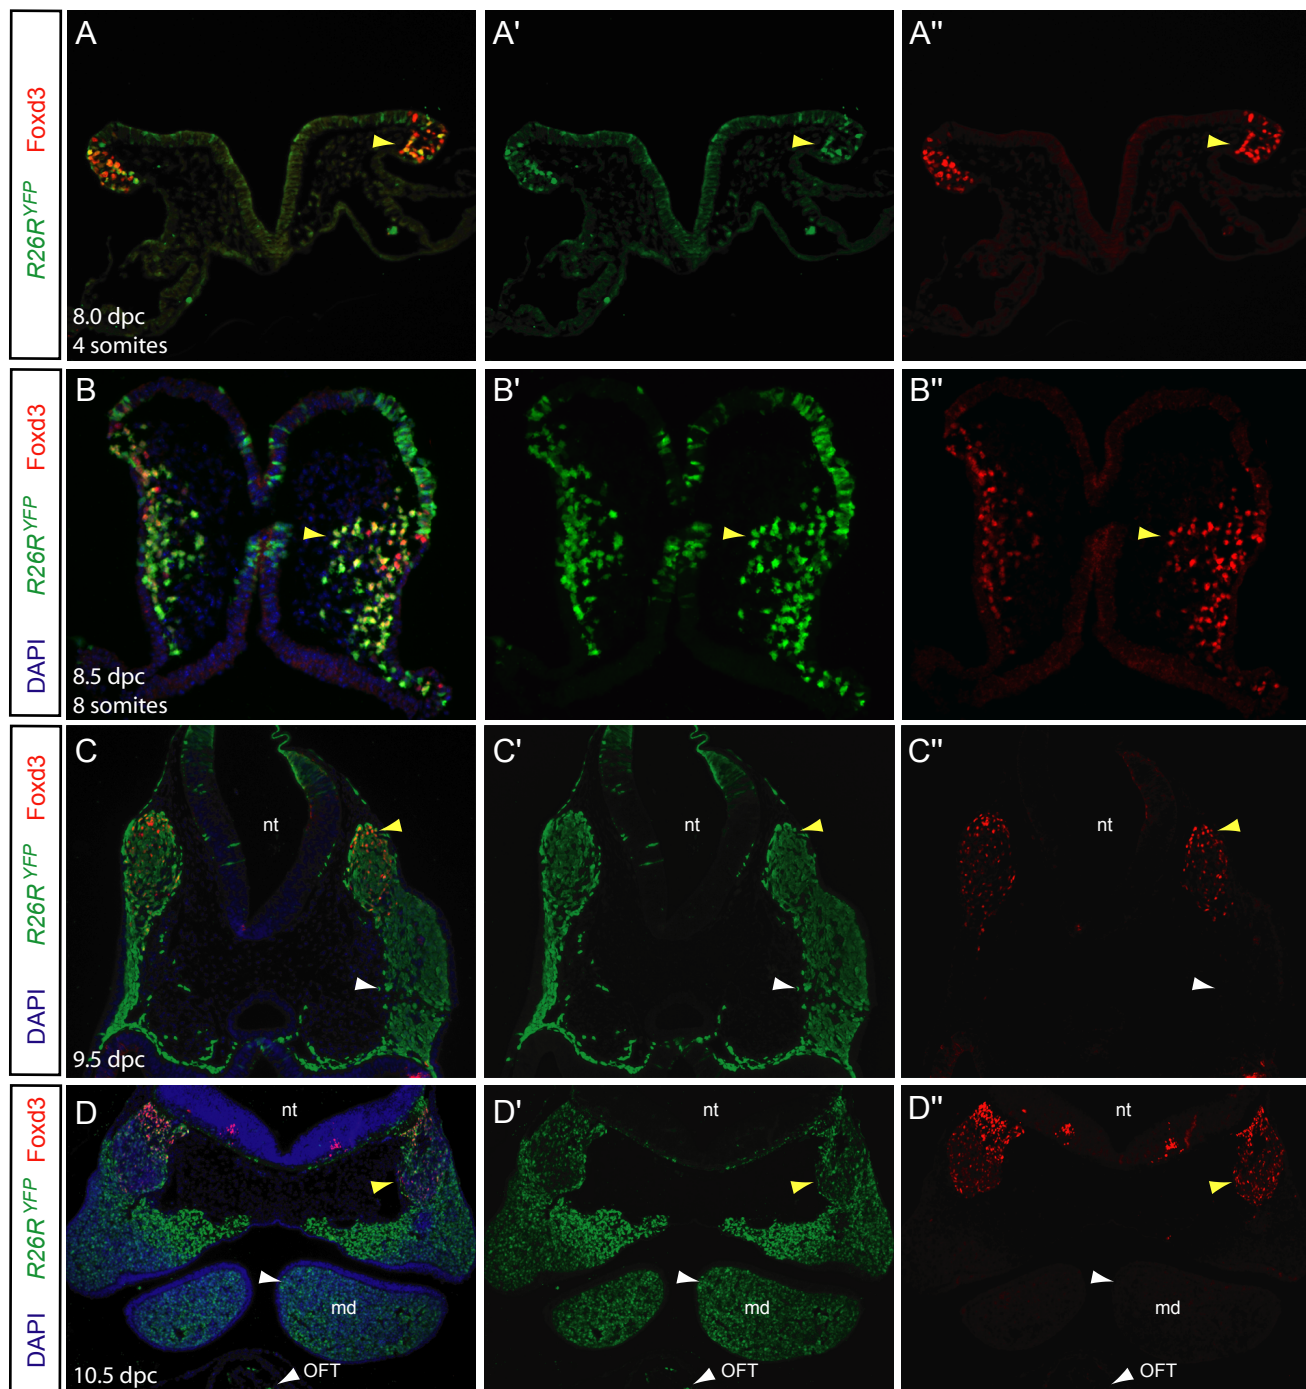

Supplement: dev054718figs1.pdf [file dev054718figs1.pdf]

Supplemental Figure 2

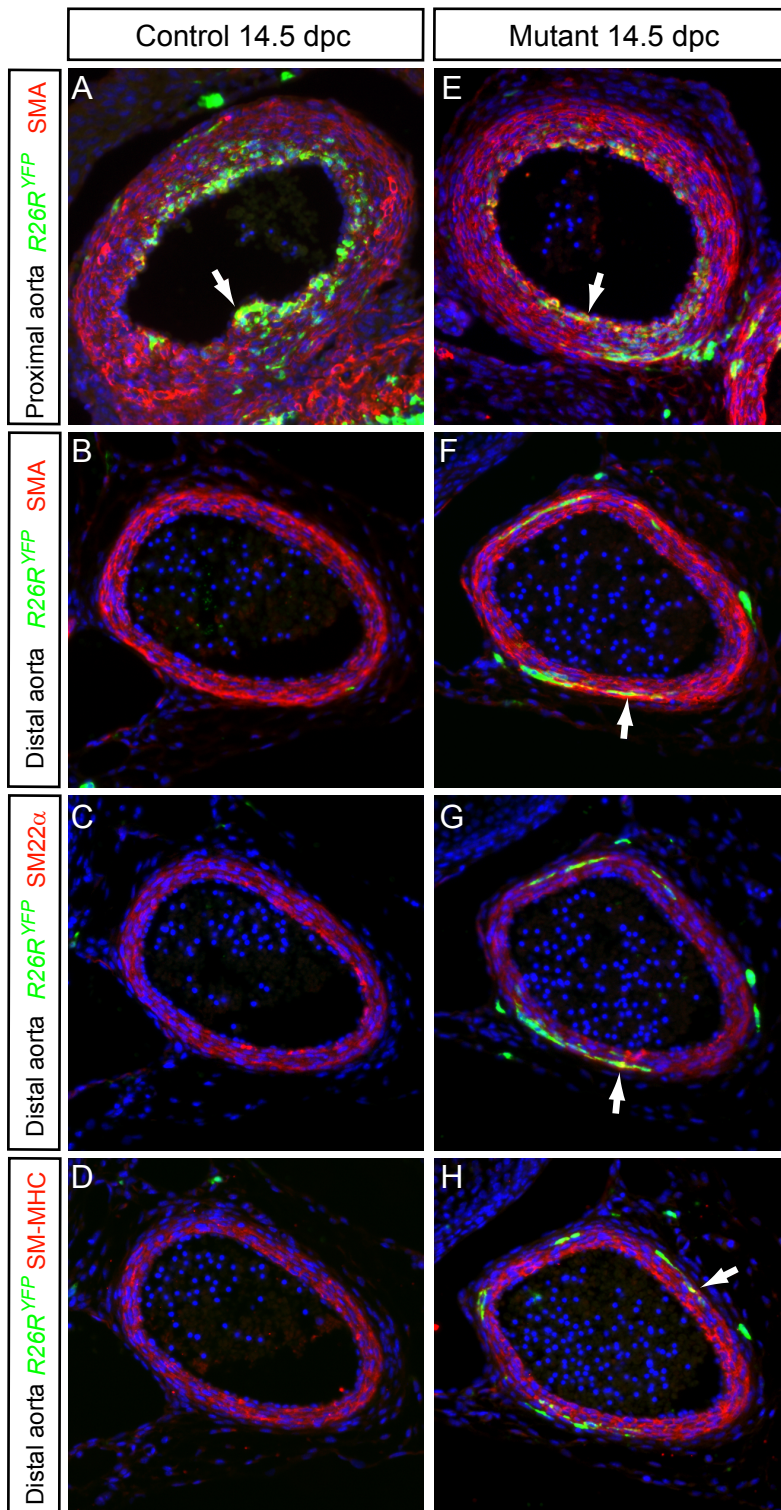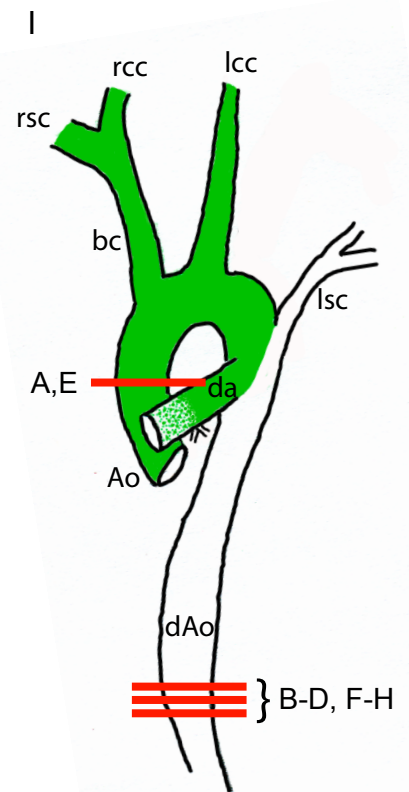

Supplement: dev054718figs2.pdf [file dev054718figs2.pdf]

# Supplemental Figure 3

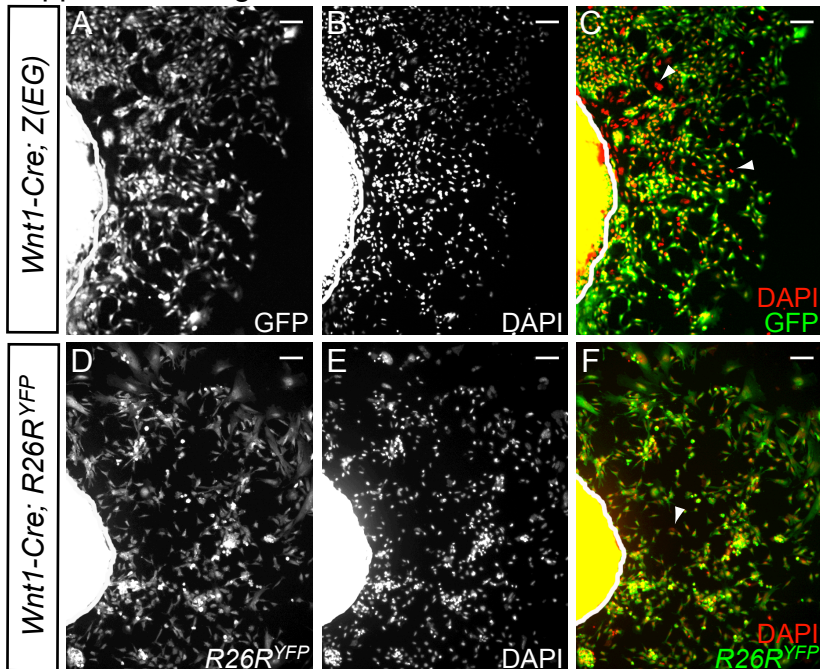

Supplement: dev054718figs3.pdf [file dev054718figs3.pdf]

Supplemental Figure 5

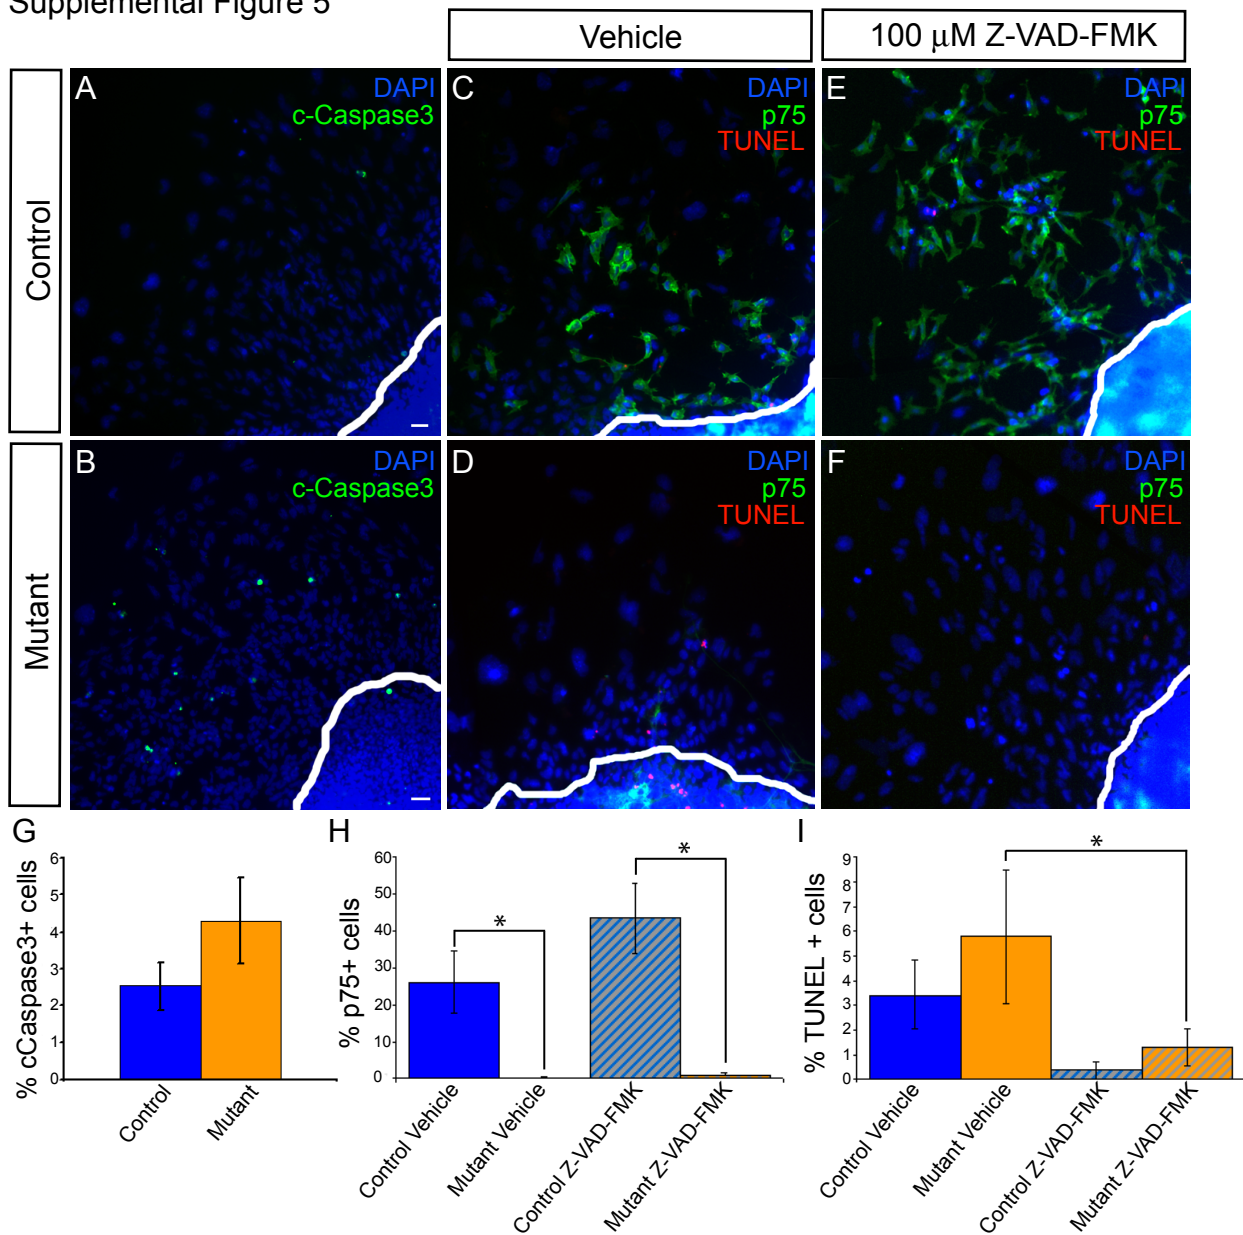

Supplement: dev054718figs5.pdf [file dev054718figs5.pdf]
